# Supplementary material for: The Ins and Outs of Urea: Identification of Putative DUR3-like Urea Transporters in the Oligohaline Nerite Snail Theodoxus fluviatilis and Their Expression under Changing Salinities
Source: MDPI journal article supplement (doi:10.3390/physiologia3020020), 2023-04-28
Supplement: s1 [file s1]

Archive with 1 entries (1 files):
- physiologia-2259326-supplementary.pdf
