# Supplementary material for: The Ins and Outs of Urea: Identification of Putative DUR3-like Urea Transporters in the Oligohaline Nerite Snail Theodoxus fluviatilis and Their Expression under Changing Salinities
Source: MDPI journal article supplement (doi:10.3390/physiologia3020020), 2023-04-28
Supplement: s1 [file s1 › physiologia-2259326-supplementary.pdf]

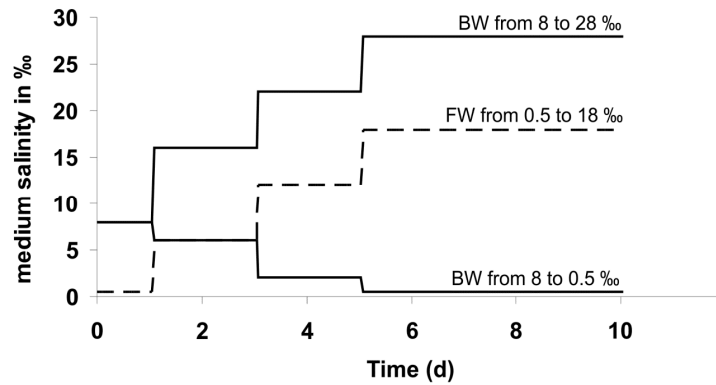

**Figure S1.** Transfer regimes used to acclimate *Theodoxus fluviatilis* individuals to media with different salinities. Snails were initially maintained in freshwater (FW ecotype, salinity 0.5 ‰) or brackish water (BW ecotype, salinity of 8 ‰). The animals were then transferred in a stepwise manner over 4 days to their final salinities. The FW animals were transferred to a maximum salinity of 18 ‰. The BW animals were either brought to a final salinity of 28 ‰ or acclimated to 0.5 ‰. Animals were maintained at these salinities for another 5 days.

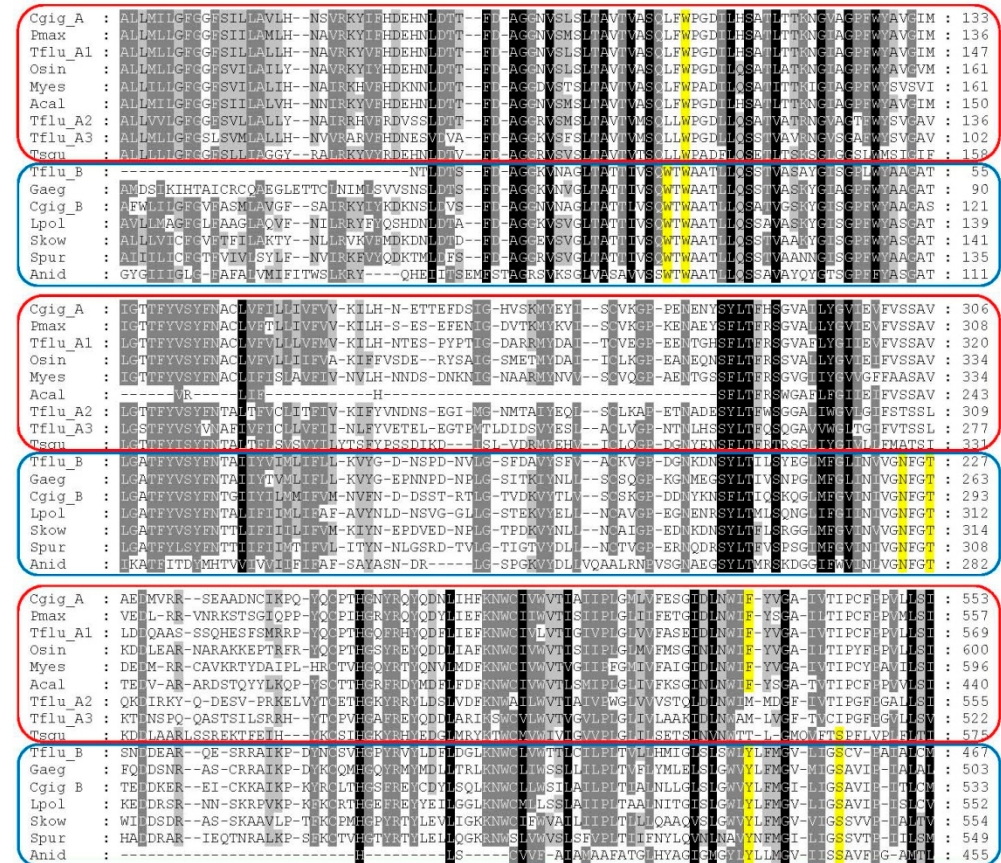

**Figure S2.** Multiple sequence alignment of putative invertebrate DUR3-like urea transporters. The black background indicates conserved amino acid residues; the gray background indicates similar residues. The red boxes enclose UT-A type transporters, the blue boxes enclose UT-B type transporters. The conserved W/W-N/T motifs as well as the Y437 and S446 residues in UT-B type transporters are highlighted in yellow. For space reasons only the relevant molecule segments are shown. *Tflu* = *Theodoxus fluviatilis*; *Cgig-A* = *Crassostrea gigas* XP\_034300743.1; *Cgig-B* = *Crassostrea gigas* XP\_01441136.2; *Lpol* = *Limulus polyphemus* XP\_13776744.1; *Skow* = *Saccoglossus kowalevskii* XP\_006823326.1; *Spur* = *Strongylocentrotus purpuratus* XP\_030829061.1; *Gaeg* = *Gigantopelta aegis* XP\_041377330.1; *Tsquin* = *Tridacna squamosa* ARQ84970.1; *Osin* = *Octopus sinensis* XP\_029639211.1;

Myes = *Mizuhopecten yessoensis* OWF45146.1; Pmax = *Pecten maximus* XP\_033744244.1; Acal = *Aplysia californica* XP\_035827281.1; Anid = *Aspergillus nidulans* ACZ62639.1.
